# Supplementary material for: Boosting the hydrogen evolution reaction on NiTe monolayers via defect engineering: a computational study
Source: Royal Society of Chemistry journal article supplement (doi:10.1039/d3qi02444j), 2024-01-01
Supplement: d3qi02444j1.pdf [file d3qi02444j1.pdf]

**Boosting the Hydrogen Evolution Reaction on NiTe Monolayer via the Defect  
Engineering: A Computational Study**

Yuchen Xiang,<sup>1</sup> Yuting Sun,<sup>1</sup> Yuejie Liu,<sup>2,\*</sup> Qinghai Cai,<sup>1</sup> Jingxiang Zhao<sup>1,\*</sup>

<sup>1</sup> *College of Chemistry and Chemical Engineering, and Key Laboratory of Photonic  
and Electronic Bandgap Materials, Ministry of Education, Harbin Normal University,  
Harbin, 150025, China*

<sup>2</sup> *Modern Experiment Center, Harbin Normal University, Harbin 150025, China*

\* *To whom correspondence should be addressed. Email: liuyuejie@hrbnu.edu.cn (Y.*

*Liu); zhaojingxiang@hrbnu.edu.cn (J. Zhao)*

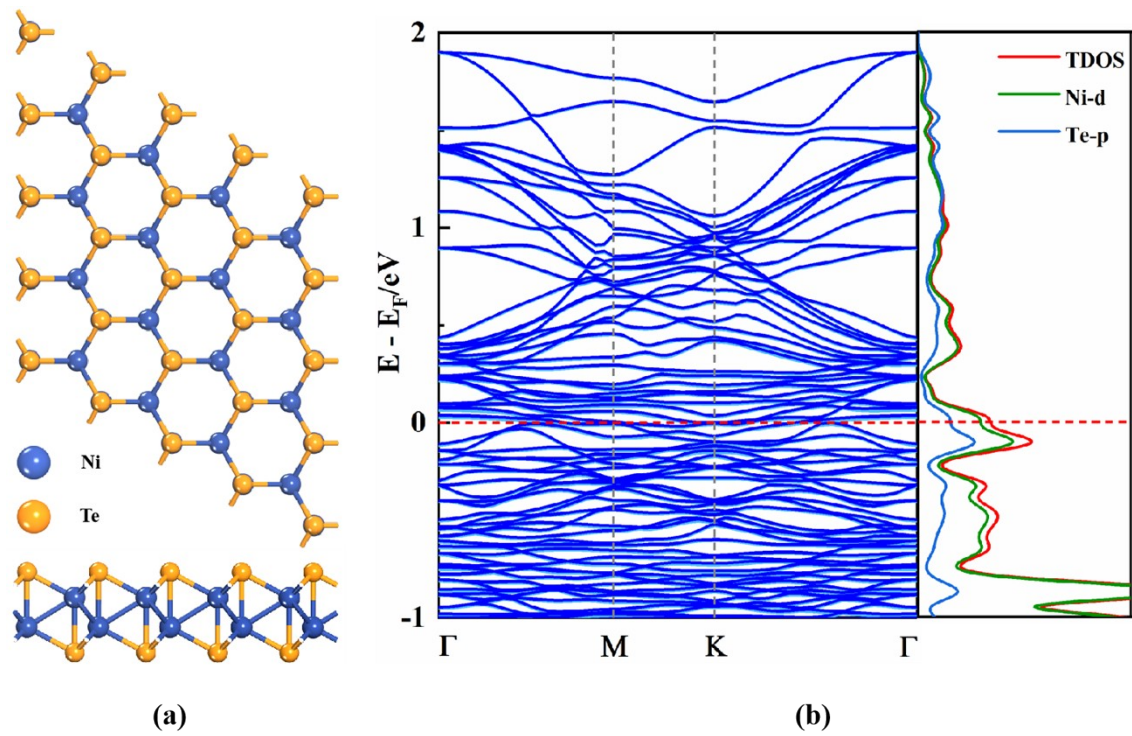

**Fig. S1.** (a) The top and side views and (b) the computed band structure and density of state (PDOS) for NiTe monolayer. The Fermi level was set to zero in red dashed line.

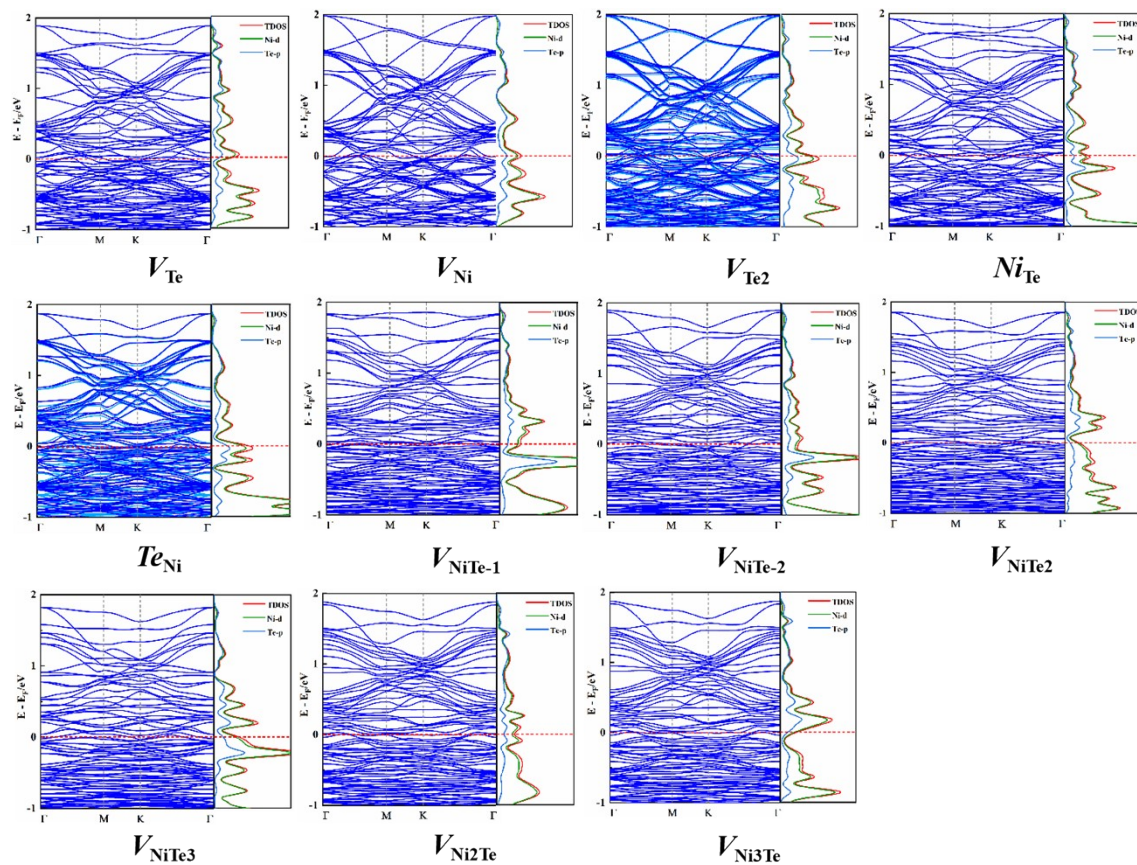

**Fig. S2.** The computed band structures and density of states (PDOSs) for different defective NiTe nanosheets. The Fermi level was set to zero in red dashed line.

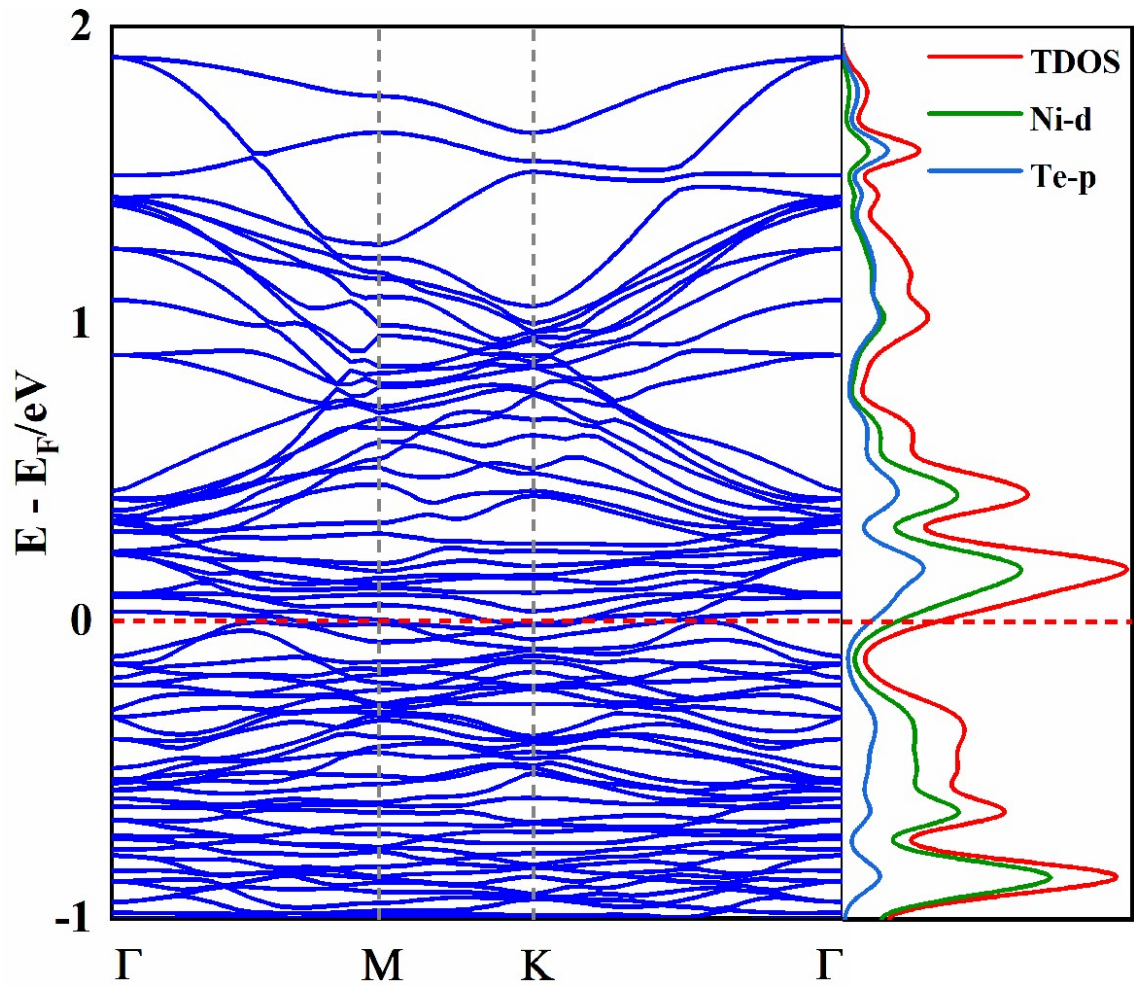

**Fig. S3.** The computed band structures and density of states (PDOSs) for  $V_{Ni_3Te}$  system.



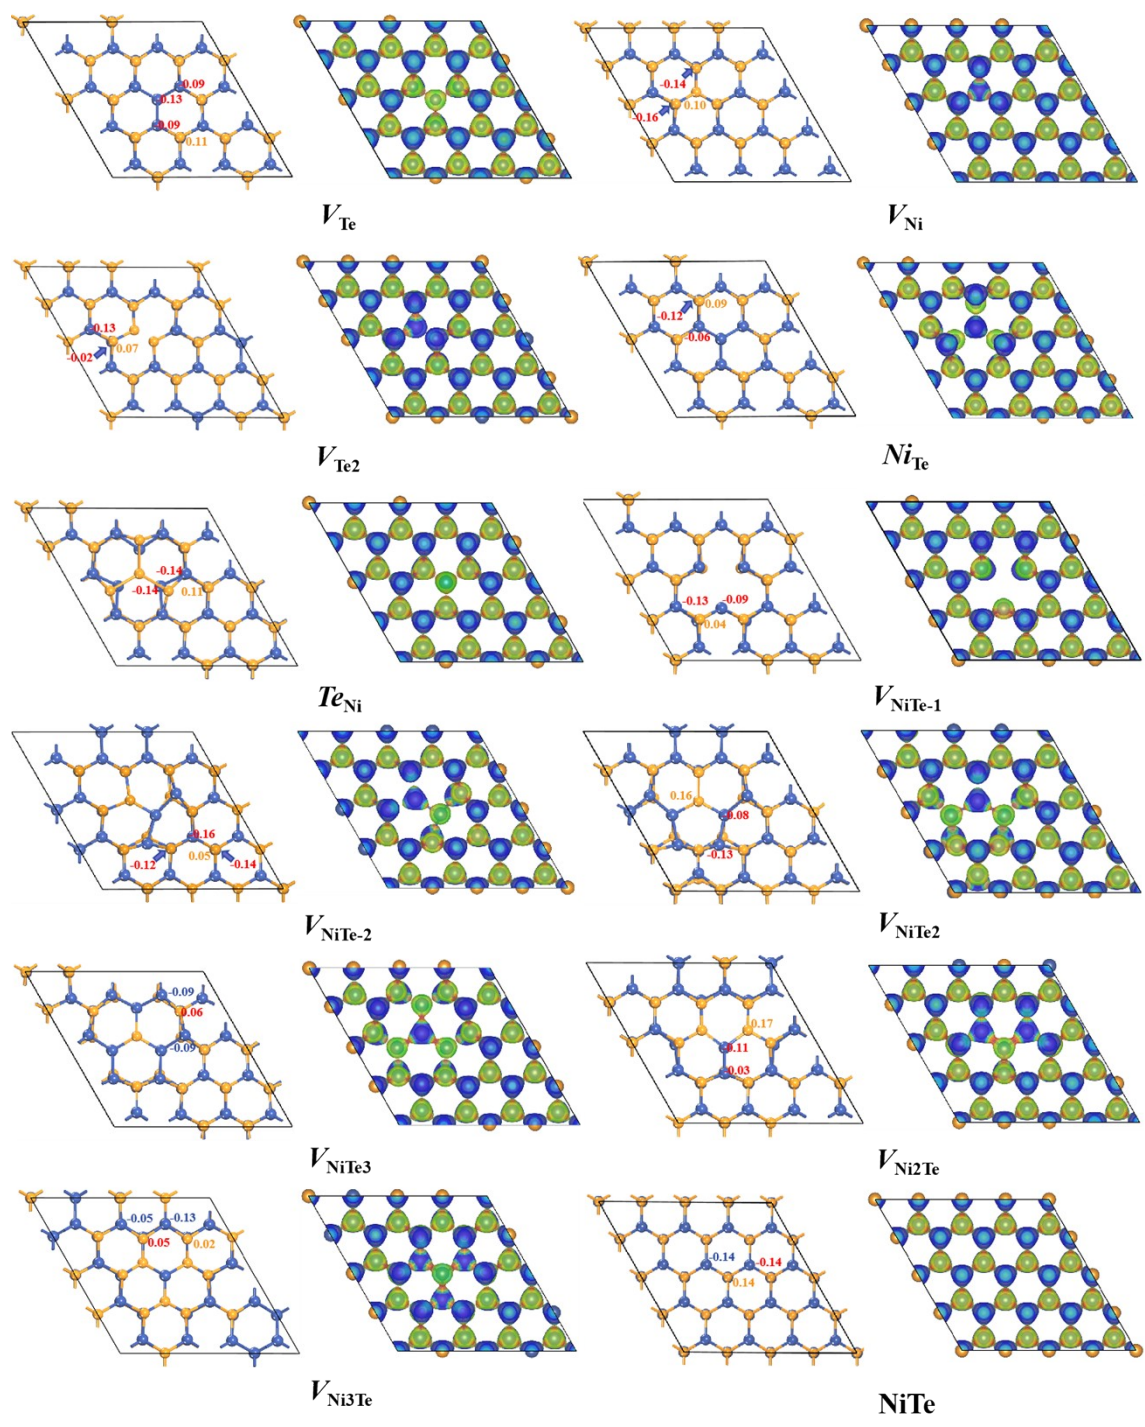

**Fig. S4.** The computed charge population and charge density of different defective NiTe nanosheets and pristine NiTe monolayer.

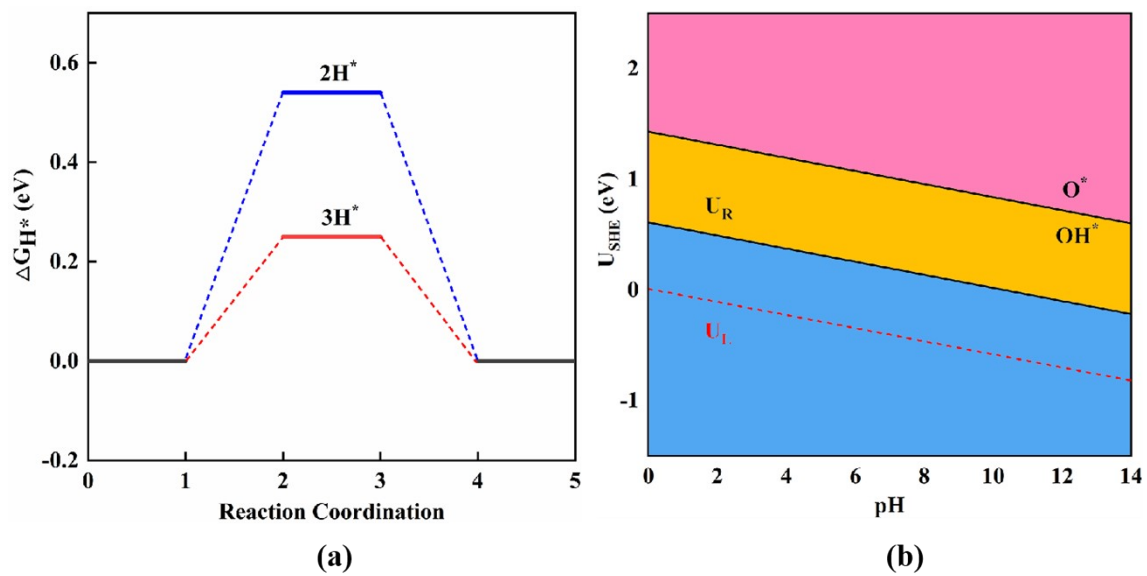

**Fig. S5.** (a) The computed  $\Delta G_{H^*}$  values for  $V_{Ni_3Te}$  system at the  $H^*$  high coverage and  
 (b) Surface Pourbaix diagram of  $V_{Ni_3Te}$ .

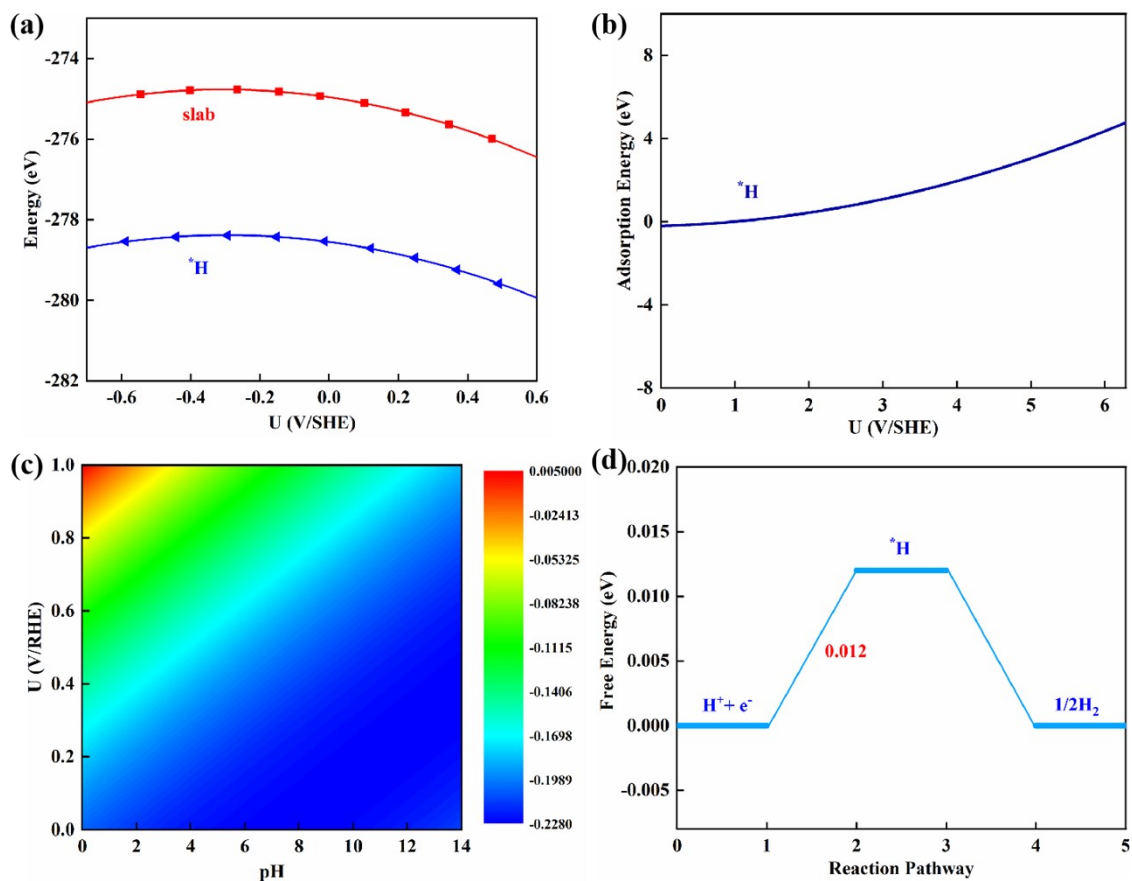

**Fig. S6.** (a) Computed energies of the  $V_{Ni3Te}$  and the corresponding reaction intermediates as a function of the applied electrode potential. (b) Adsorption energies of  $H^*$  as a function of the applied electrode potential. (c) pH-Dependent and potential-dependent contour plot of adsorption energies of  $H^*$  on the  $V_{Ni3Te}$ . (d) The free energy profile for  $H^*$  electrocatalytic reduction on the  $V_{Ni3Te}$  system in  $pH = 7.52$ .

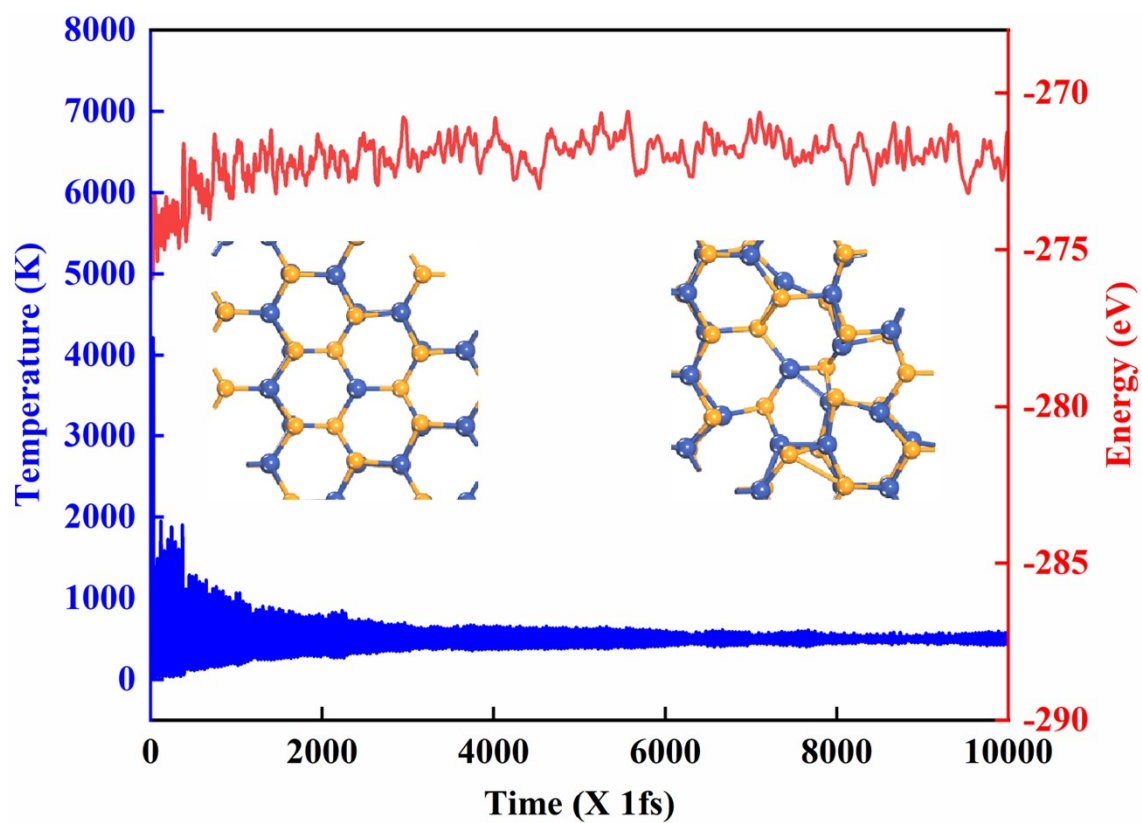

**Fig. S7.** Structure of  $V_{Ni_3Te}$  monolayer after AIMD simulations at 500 K for a period of 10 ps with a time step of 1.0 fs, and the corresponding variations of temperature and energy versus simulation time.
